# Supplementary material for: Adolescent girls trapped in early marriage social norm in rural Ethiopia: A vignette-based qualitative exploration
Source: PLoS One. 2022 Feb 17;17(2):e0263987. doi: 10.1371/journal.pone.0263987 (PMC8853576; doi:10.1371/journal.pone.0263987)
Supplement: S1 File — (ZIP) [file pone.0263987.s002.zip]

Archive with 20 entries (20 files):
- PDF FGD data/FGD 01_UAG_D3.pdf
- PDF FGD data/FGD 02_MAG_D3.pdf
- PDF FGD data/FGD 03_MOAG_D3.pdf
- PDF FGD data/FGD 04_UAB_D3.pdf
- PDF FGD data/FGD 05_FAG_D3.pdf
- PDF FGD data/FGD 06_MAG_D2.pdf
- PDF FGD data/FGD 07_UAB_D2.pdf
- PDF FGD data/FGD 08_UAG_D2.pdf
- PDF FGD data/FGD 09_MOAG_D2.pdf
- PDF FGD data/FGD 10_FAG_D2.pdf
- PDF FGD data/FGD 11_FAG_D1.pdf
- PDF FGD data/FGD 12_UAG_D1.pdf
- PDF FGD data/FGD 13_MAG_D1.pdf
- PDF FGD data/FGD 14_MOAG_D1.pdf
- PDF FGD data/FGD 15_UAB_D1.pdf
- PDF FGD data/FGD 16_MAG_D4.pdf
- PDF FGD data/FGD 17_UAG_D4.pdf
- PDF FGD data/FGD 18_FAG_D4.pdf
- PDF FGD data/FGD 19_MOAG_D4.pdf
- PDF FGD data/FGD 20_UAB_D4.pdf
